# Supplementary material
Source: publisher figshare collection journal article supplement (https://tandf.figshare.com/ndownloader/files/14108075)

**Supplementary Figure 1.** Representative cytopsin images of proerythroblasts (Pro-E), basophilic erythroblasts (Baso-E), polychromatic erythroblasts (Poly-E), orthochromatic erythroblasts (Ortho-E) and mature erythrocytes.

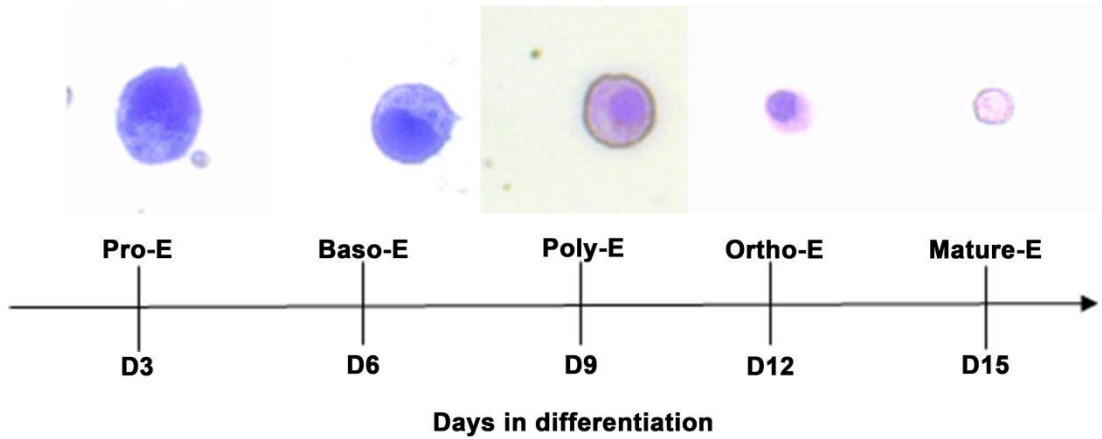

**Supplementary Figure 2.** Proportion of erythrocytes in the differentiated cultured cells on day 5, day 10 and day 15, verified by cell count based on Wright-Giemsa-stained morphology (Counts of cells include Pro-E, Baso-E, Poly-E, Ortho-E and mature erythrocytes).

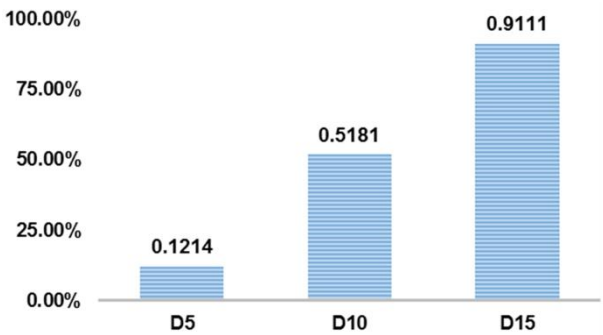

**Supplementary Figure 3.** Flow cytometry analysis showing CD235a expression in cultured cells after 15 days.

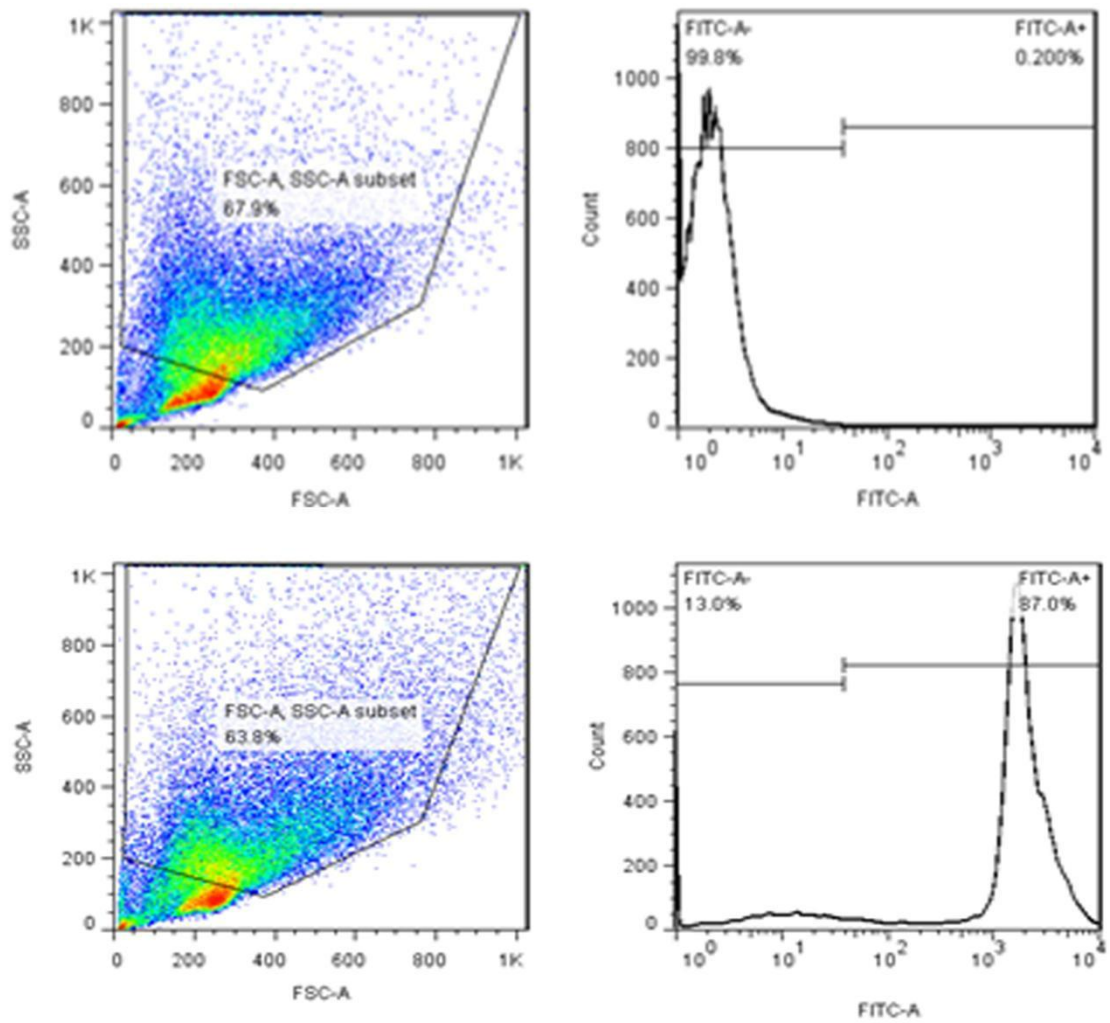

**Supplementary Figure 4.** qPCR showing CD235a expression in differentiated cultured cells on day 5, day 10 and day 15.

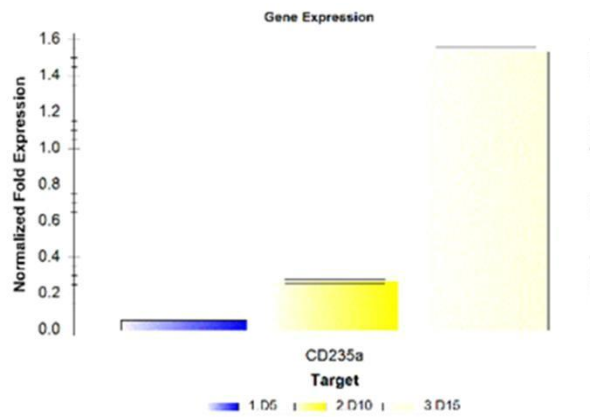

**Supplementary Figure 5.** qPCR showing  $\gamma/\beta$ -globin mRNA ratios in differentiated cultured cells on day 5, day 10 and day 15.

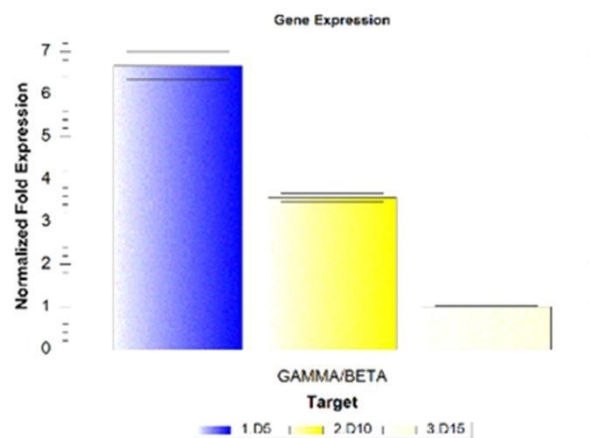

Supplement: Supplementary file 1 [file 14108075]
